# Supplementary material for: Imaging the orientation of hydroxyapatite crystallites across full mouse femora
Source: Royal Society of Chemistry journal article supplement (doi:10.1039/d5fd00009b), 2025-01-01
Supplement: d5fd00009b1.pdf [file d5fd00009b1.pdf]

## ARTICLE

### Supporting information

Thorbjørn Erik Køppen Christensen,<sup>\*a,b</sup> Takeshi Moriishi<sup>c</sup> and Toshihisa Komori<sup>d</sup>

Received 00th January 20xx,  
Accepted 00th January 20xx

DOI: 10.1039/x0xx00000x

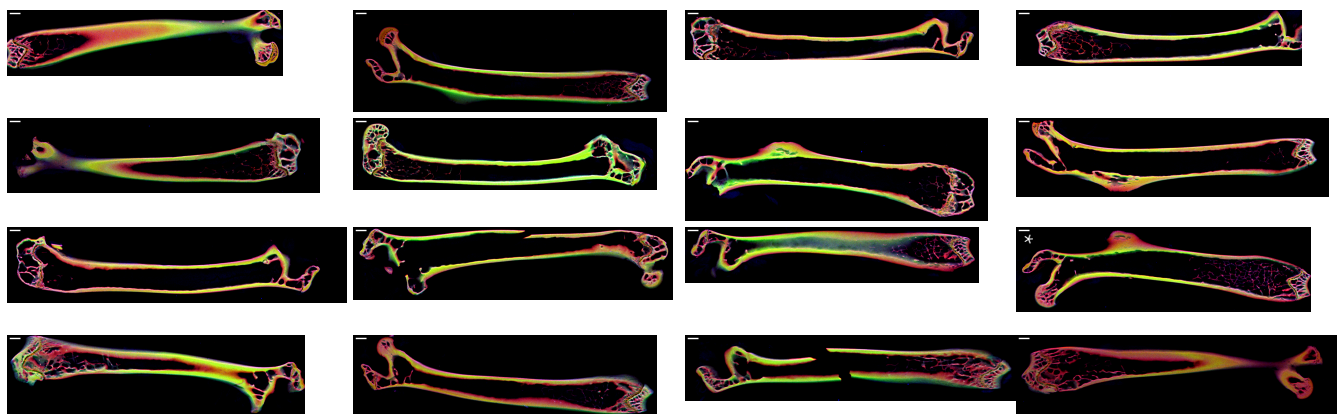

Figure S1: XRF maps of all samples. Red: Ca, Green: Sr, Blue: Zn. Scale bar is 600  $\mu\text{m}$ . sample marked with a \* is shown in the main article.

<sup>a</sup> DanMAX, MAX IV, Lund Sweden.

<sup>b</sup> DTU Compute, Technological University of Denmark, Kongens Lyngby, Denmark.

<sup>c</sup> Department of Cell Biology, Nagasaki University Graduate School of Biomedical Sciences, Nagasaki, Japan.

<sup>d</sup> Department of Molecular Tumour Biology, Nagasaki University Graduate School of Biomedical Sciences, Nagasaki, Japan

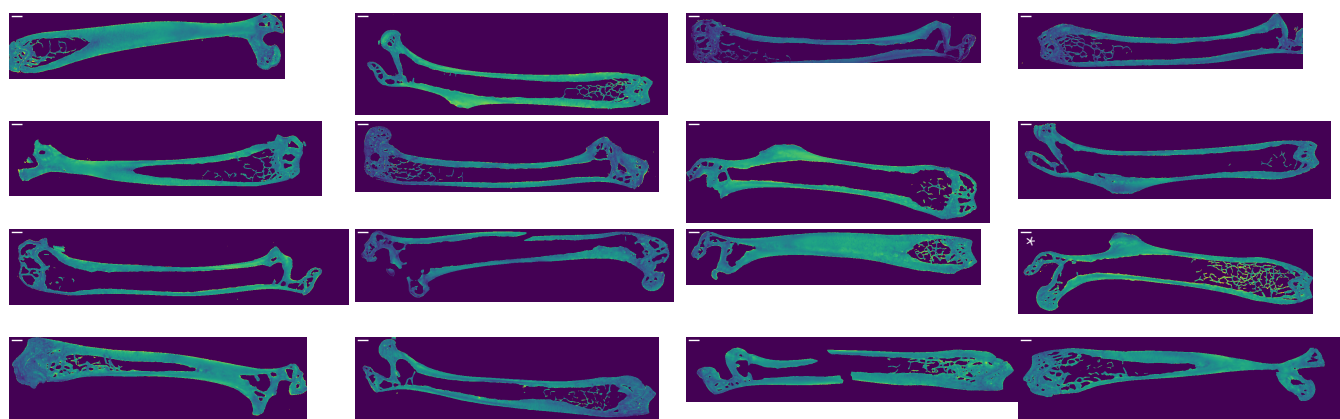

Figure S2: Unit cell  $c$  axis. Scale bars are 600  $\mu\text{m}$ . Colour bar from 6.65 to 8.95 Å. Sample marked with \* is shown in the main article.

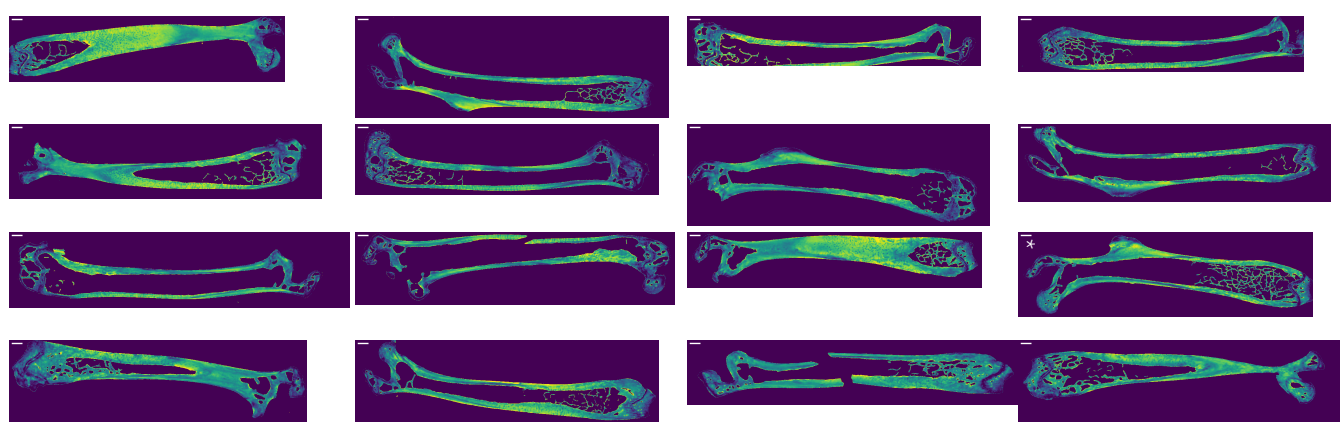

Figure S3: Apparent crystallite size in the  $\langle 002 \rangle$  direction. Colour bar from 20 to 28 nm. Sample marked with \* shown in the main article. Scale bars are 600  $\mu\text{m}$ .

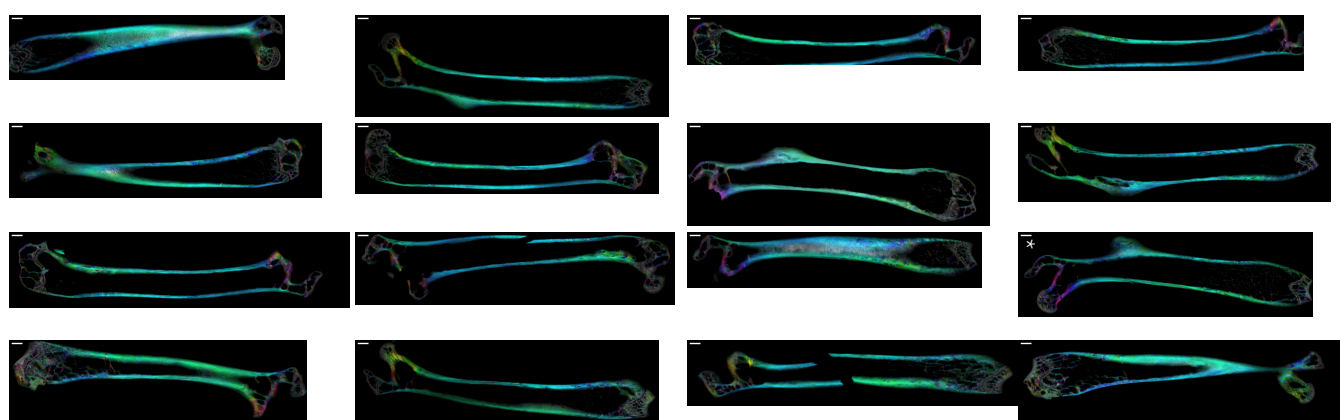

Figure S4: Orientation maps for all bones used in the study. Hue: direction, Saturation: Degree of Orientation, Value: Total 002 signal. Scale bars are 600  $\mu\text{m}$ . Sample marked with \* is shown in the main article

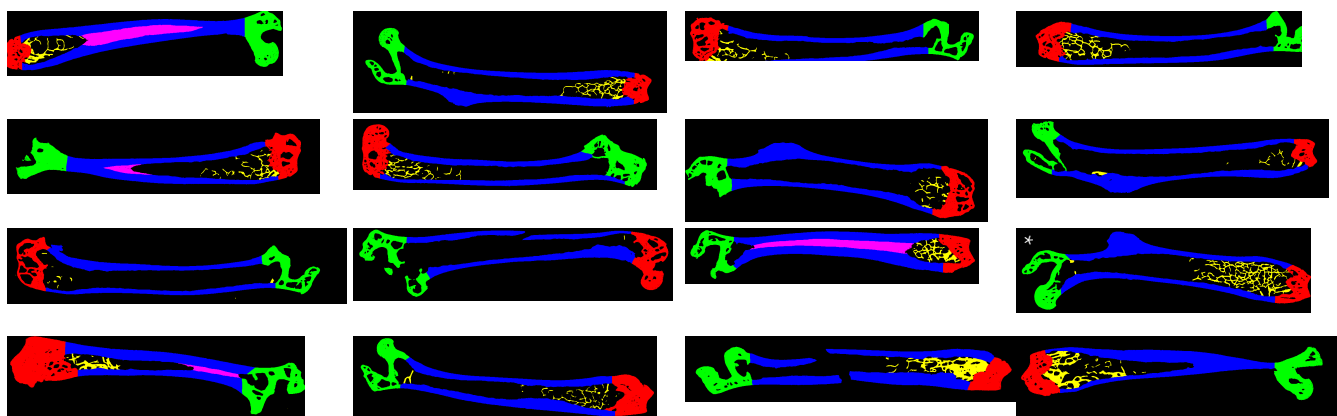

Figure S5: Segmentation maps for all samples used in the study. Blue: Cortical, Green: Femoral head, Red: Condyle, Yellow: trabeculae, Magenta: Central cortex, the different orientation this is scanned from means that another crystallite population is probed, hence it is removed from the statistical analysis. Sample marked with \* is shown in main article.
